# Supplementary figures and images for: Selenium Deficiency Exacerbates Hyperoxia-Induced Lung Injury in Newborn C3H/HeN Mice
Source: MDPI journal article supplement (doi:10.3390/antiox13040391), 2024-03-25

# GSEA Hallmark Gense sets (All comparison)

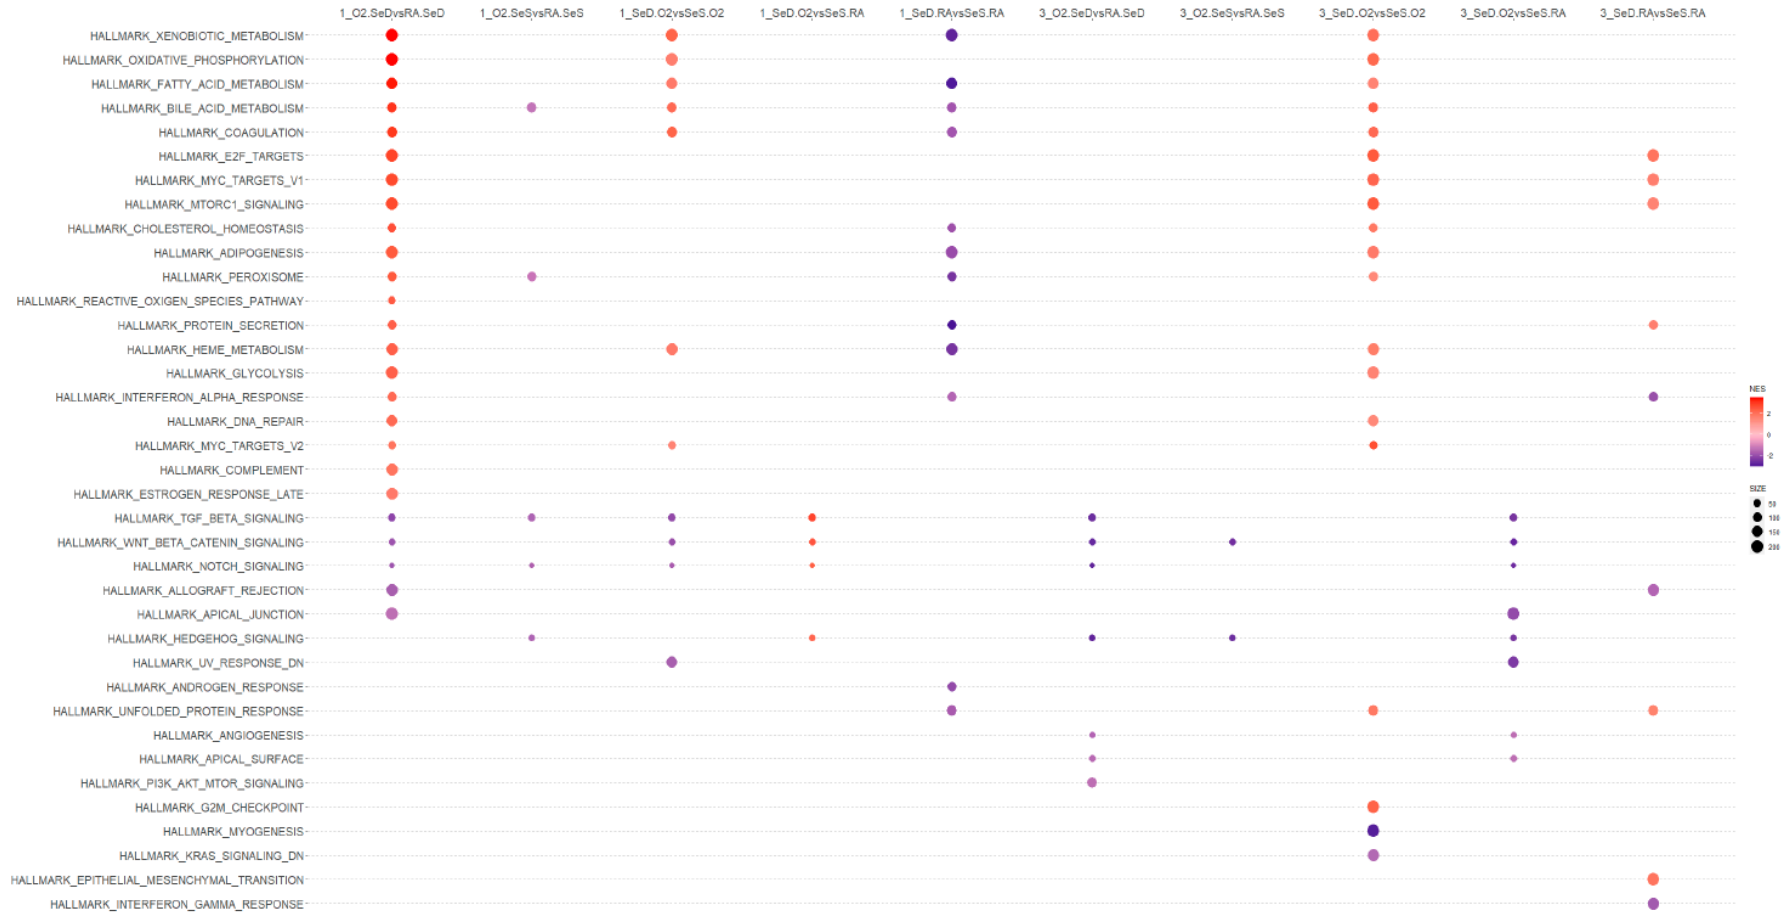

Figure S1. GSEA Hallmark Gense Sets.

Supplement: s1 [file s1]
